# Supplementary material
Source: MDPI journal article supplement (https://www.mdpi.com/2304-6740/8/10/57)
Supplement: s1 [file s1]

No syntax errors found.  
Please wait while processing ....

[CIF dictionary](#)  
[Interpreting this report](#)

## Datablock: BaBH42-NH3

Bond precision: = 0.0000 Å Wavelength=0.71073

Cell: a=5.08626(8) b=9.37609(16) c=12.9631(2)  
alpha=90 beta=90 gamma=90

Temperature: 368 K

|                    | Calculated        | Reported          |
|--------------------|-------------------|-------------------|
| Volume             | 618.200(17)       | 618.203(18)       |
| Space group        | P 21 21 21        | P 21 21 21        |
| Hall group         | P 2ac 2ab         | P 2ac 2ab         |
| Moiety formula     | H3 N, 2(B H4), Ba | Ba(BH4)2(NH3)     |
| Sum formula        | B2 Ba H11 N       | BaNb2H11          |
| Mr                 | 184.05            | 184.05            |
| Dx, g cm-3         | 1.977             | 0.000             |
| Z                  | 4                 | 2                 |
| Mu (mm-1)          | 6.270             | 0.000             |
| F000               | 336.0             | 0.0               |
| F000'              | 334.79            |                   |
| h,k,lmax           | 3,6,9             |                   |
| Nref               | 238[ 161]         |                   |
| Tmin,Tmax          |                   |                   |
| Tmin'              |                   |                   |
| Correction method= | Not given         |                   |
| Data completeness= | 0.00/0.00         | Theta(max)=       |
| R(reflections)=    |                   | wR2(reflections)= |
| S =                | Npar=             |                   |

The following ALERTS were generated. Each ALERT has the format

**test-name\_ALERT\_alert-type\_alert-level.**

Click on the hyperlinks for more details of the test.

### Alert level A

[GEOM001\\_ALERT\\_1\\_A](#) \_geom\_bond\_atom\_site\_label\_1 is missing  
Label identifying the atom site 1.

[GEOM002\\_ALERT\\_1\\_A](#) \_geom\_bond\_atom\_site\_label\_2 is missing  
Label identifying the atom site 2.

[GEOM003\\_ALERT\\_1\\_A](#) \_geom\_bond\_distance is missing  
Distance between atom sites 1 and 2.

[GEOM006\\_ALERT\\_1\\_A](#) \_geom\_angle\_atom\_site\_label\_2 is missing  
Label identifying the atom site 2.

[GEOM007\\_ALERT\\_1\\_A](#) \_geom\_angle\_atom\_site\_label\_3 is missing  
Label identifying the atom site 3.

[PLAT043\\_ALERT\\_1\\_A](#) Calculated and Reported Mol. Weight Differ by .. 92.02 Check

[PLAT699\\_ALERT\\_1\\_A](#) Missing \_exptl\_crystal\_description Value ..... Please Do !

### Alert level C

[REFI015\\_ALERT\\_1\\_C](#) \_refine\_ls\_shift/su\_max is missing  
Maximum shift/s.u. ratio after final refinement cycle.  
The following tests will not be performed  
SHFSU\_01

[CRYSC01\\_ALERT\\_1\\_C](#) No recognised colour has been given for crystal colour.

[PLAT041\\_ALERT\\_1\\_C](#) Calc. and Reported SumFormula Strings Differ Please Check

[PLAT415\\_ALERT\\_2\\_C](#) Short Inter D-H...H-X H5 ..H9 . 2.09 Ang.  
1/2+x,1/2-y,1-z = 2\_556 Check

[PLAT420\\_ALERT\\_2\\_C](#) D-H Without Acceptor N1 --H11 . Please Check

### Alert level G

[FORMU01\\_ALERT\\_1\\_G](#) There is a discrepancy between the atom counts in the  
\_chemical\_formula\_sum and \_chemical\_formula\_moiety. This is

usually due to the moiety formula being in the wrong format.  
 Atom count from \_chemical\_formula\_sum: H11 B2 Ba1 N1  
 Atom count from \_chemical\_formula\_moiety:  
[FORMU01 ALERT 2 G](#) There is a discrepancy between the atom counts in the  
 \_chemical\_formula\_sum and the formula from the \_atom\_site\* data.  
 Atom count from \_chemical\_formula\_sum: H11 B2 Ba1 N1  
 Atom count from the \_atom\_site data: H22 B4 Ba2 N2  
[CELLZ01 ALERT 1 G](#) Difference between formula and atom\_site contents detected.  
[CELLZ01 ALERT 1 G](#) ALERT: Large difference may be due to a  
 symmetry error - see SYMMG tests  
 From the CIF: \_cell\_formula\_units\_Z 2  
 From the CIF: \_chemical\_formula\_sum BaNB2H11  
 TEST: Compare cell contents of formula and atom\_site data  
 WARNING: Unexpected atom type is in site list: Ba  
 WARNING: Unexpected atom type is in site list: B  
 WARNING: Unexpected atom type is in site list: N  
 WARNING: Formula and atom\_type\_symbol element names mismatch.

| atom | Z*formula | cif sites | diff   |
|------|-----------|-----------|--------|
| BaNB | 4.00      | 0.00      | 4.00   |
| H    | 22.00     | 44.00     | -22.00 |

WARNING: Site labels do not match formula elements

|                                   |                                                  |              |
|-----------------------------------|--------------------------------------------------|--------------|
| <a href="#">PLAT007 ALERT 5 G</a> | Number of Unrefined Donor-H Atoms .....          | 3 Report     |
| <a href="#">PLAT042 ALERT 1 G</a> | Calc. and Reported MoietyFormula Strings Differ  | Please Check |
| <a href="#">PLAT045 ALERT 1 G</a> | Calculated and Reported Z Differ by a Factor ... | 2.00 Check   |
| <a href="#">PLAT769 ALERT 4 G</a> | CIF Embedded explicitly supplied scattering data | Please Note  |
| <a href="#">PLAT982 ALERT 1 G</a> | The B-f' = 0.0000 Deviates from IT-value =       | 0.0013 Check |

**And 2 other PLAT982 Alerts**  
 More ...

- 
- 7 **ALERT level A** = Most likely a serious problem - resolve or explain  
 0 **ALERT level B** = A potentially serious problem, consider carefully  
 5 **ALERT level C** = Check. Ensure it is not caused by an omission or oversight  
 11 **ALERT level G** = General information/check it is not something unexpected
- 18 **ALERT type 1** CIF construction/syntax error, inconsistent or missing data  
 3 **ALERT type 2** Indicator that the structure model may be wrong or deficient  
 0 **ALERT type 3** Indicator that the structure quality may be low  
 1 **ALERT type 4** Improvement, methodology, query or suggestion  
 1 **ALERT type 5** Informative message, check
- 

It is advisable to attempt to resolve as many as possible of the alerts in all categories. Often the minor alerts point to easily fixed oversights, errors and omissions in your CIF or refinement strategy, so attention to these fine details can be worthwhile. In order to resolve some of the more serious problems it may be necessary to carry out additional measurements or structure refinements. However, the purpose of your study may justify the reported deviations and the more serious of these should normally be commented upon in the discussion or experimental section of a paper or in the "special\_details" fields of the CIF. checkCIF was carefully designed to identify outliers and unusual parameters, but every test has its limitations and alerts that are not important in a particular case may appear. Conversely, the absence of alerts does not guarantee there are no aspects of the results needing attention. It is up to the individual to critically assess their own results and, if necessary, seek expert advice.

## Publication of your CIF in IUCr journals

A basic structural check has been run on your CIF. These basic checks will be run on all CIFs submitted for publication in IUCr journals (*Acta Crystallographica*, *Journal of Applied Crystallography*, *Journal of Synchrotron Radiation*); however, if you intend to submit to *Acta Crystallographica Section C* or *E* or *IUCrData*, you should make sure that [full publication checks](#) are run on the final version of your CIF prior to submission.

## Publication of your CIF in other journals

Please refer to the *Notes for Authors* of the relevant journal for any special instructions relating to CIF submission.

---

**PLATON version of 10/08/2020; check.def file version of 06/08/2020**

## **Datablock BaBH42-NH3 - ellipsoid plot**

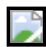

---

[Download CIF editor \(publCIF\) from the IUCr](#)  
[Download CIF editor \(enCIFer\) from the CCDC](#)  
[Test a new CIF entry.](#)
